# Supplementary material
Source: PubMed Central journal article supplement (PMC4814017)
Supplement: DS_10.1177_0022034514566432.pdf [file DS_10.1177_0022034514566432.pdf]

# Osteogenic Responses to Zirconia with Hydroxyapatite Coating by Aerosol Deposition

Journal of Dental Research  
DSI  
© International & American Associations  
for Dental Research 2015  
Reprints and permissions:  
sagepub.com/journalsPermissions.nav  
DOI: 10.1177/0022034514566432  
jdr.sagepub.com

Y. Cho<sup>1,2,3\*</sup>, J. Hong<sup>1\*</sup>, H. Ryoo<sup>3</sup>, D. Kim<sup>4</sup>, J. Park<sup>5</sup>, and J. Han<sup>1</sup>

## Appendix

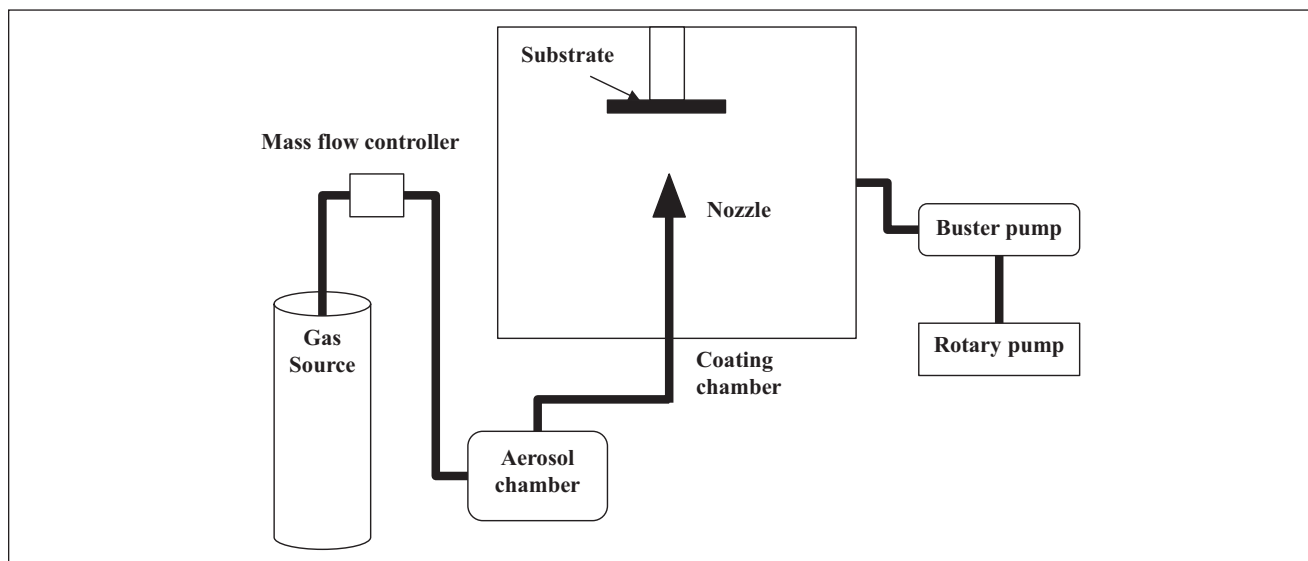

**Appendix Figure.** Schematic of the aerosol deposition process.

<sup>1</sup>Department of Prosthodontics, School of Dentistry and Dental Research Institute, BK21 Program, Seoul National University, Seoul, Korea

<sup>2</sup>Department of Periodontology, School of Dentistry and Dental Research Institute, BK21 Program, Seoul National University, Seoul, Korea

<sup>3</sup>Department of Molecular Genetics, School of Dentistry and Dental Research Institute, BK21 Program, Seoul National University, Seoul, Korea

<sup>4</sup>Department of Advanced Materials Engineering, Sejong University, Seoul, Korea

<sup>5</sup>R&D Center, Nano Business, IONES Co., Ltd., Gyeonggi-do, Korea

\*Authors contributing equally to this article

### Corresponding Author:

J. Han, Department of Prosthodontics, School of Dentistry, Seoul National University, 28 Yeongeon-dong, Jongno-gu, Seoul, Korea, 110-749.  
Email: proshan@snu.ac.kr
